# Supplementary material for: Sleeping at the switch
Source: eLife journal article supplement (doi:10.7554/elife.64337), 2021-08-27
Supplement: supp [file elife-64337-supp-v1.zip]

Archive with 5 entries (5 files):
- elife_poa_e64337_Transparent_Reporting_File.pdf
- elife_poa_e64337_Supplementary_File_1.docx
- elife_poa_e64337_Figure_2_figure_supplement_1.eps
- elife_poa_e64337_Figure_3_figure_supplement_1.eps
- elife_poa_e64337_Figure_3_figure_supplement_2.eps
